# Supplementary material
Source: PubMed Central journal article supplement (PMC7681568)

**Figure S1**

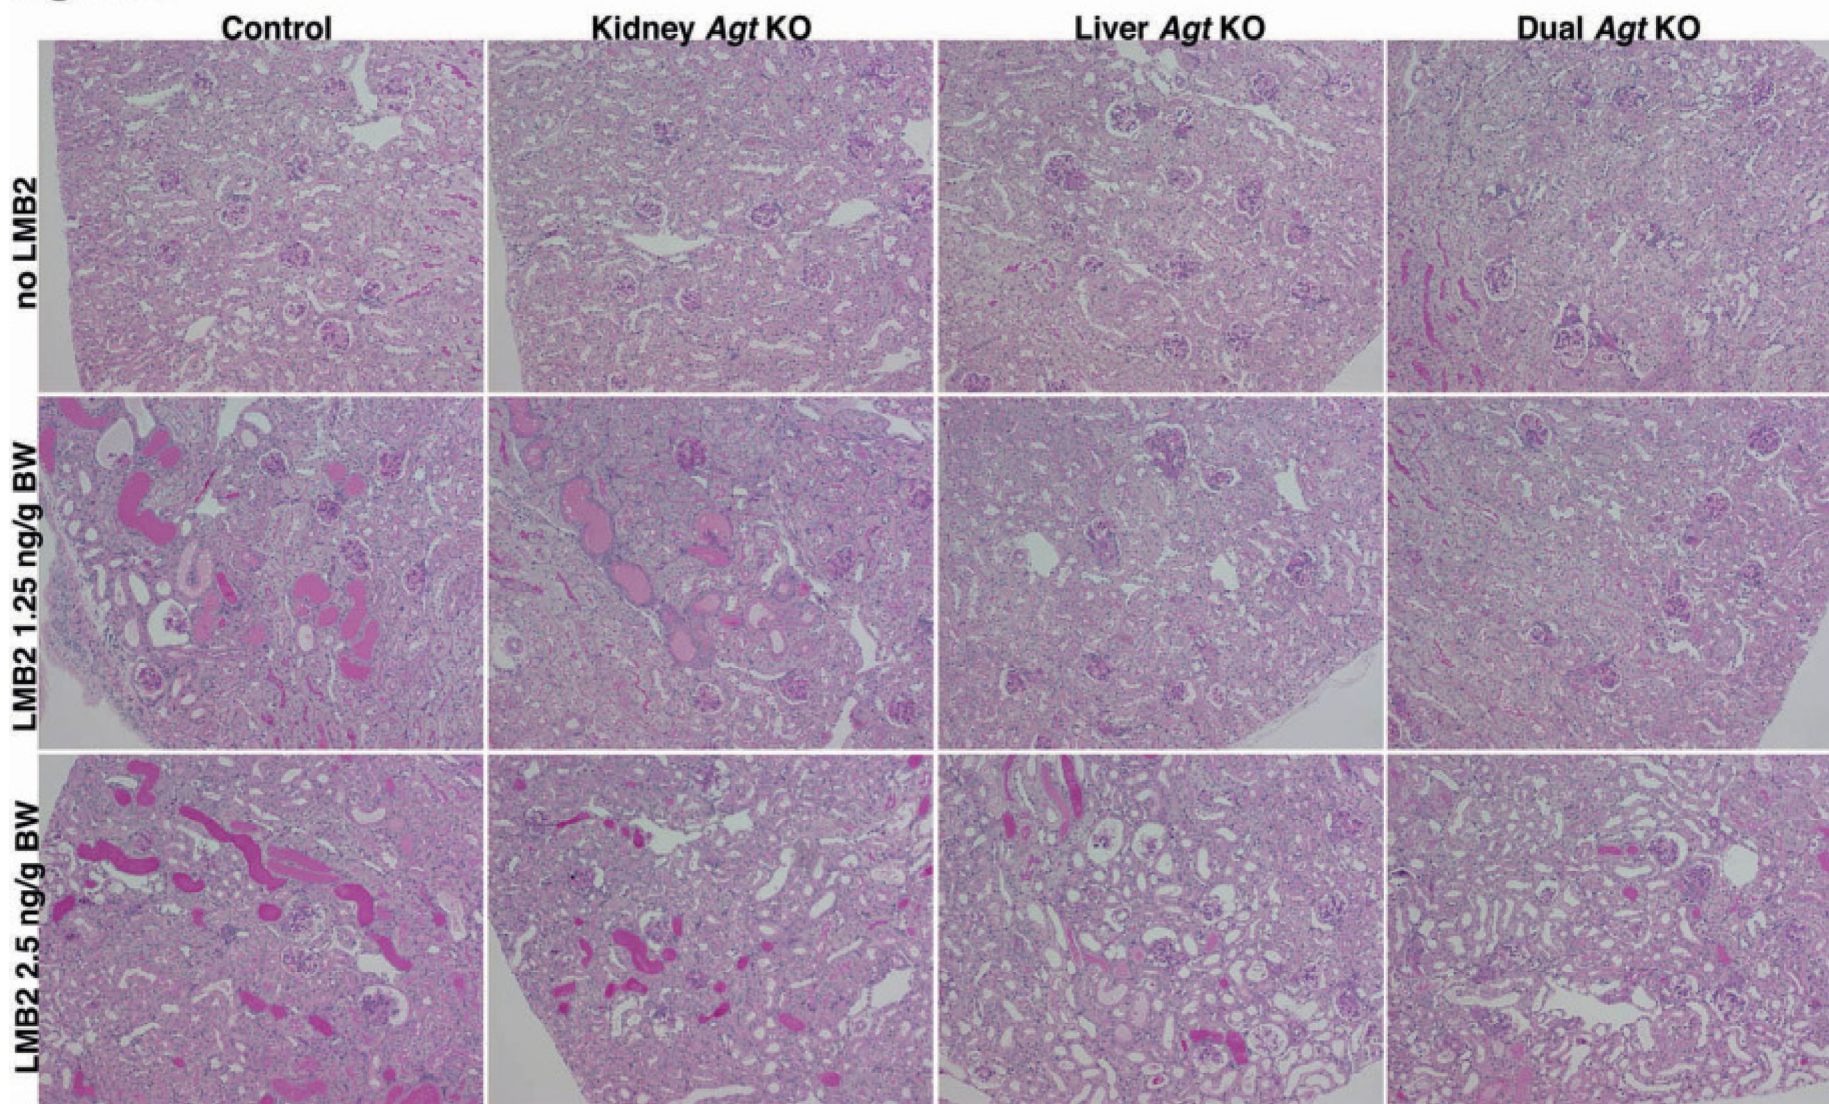

Supplement: NIHMS1643223-supplement-Supplemental_figure_S1.pdf [file NIHMS1643223-supplement-Supplemental_figure_S1.pdf]

**Figure S2**

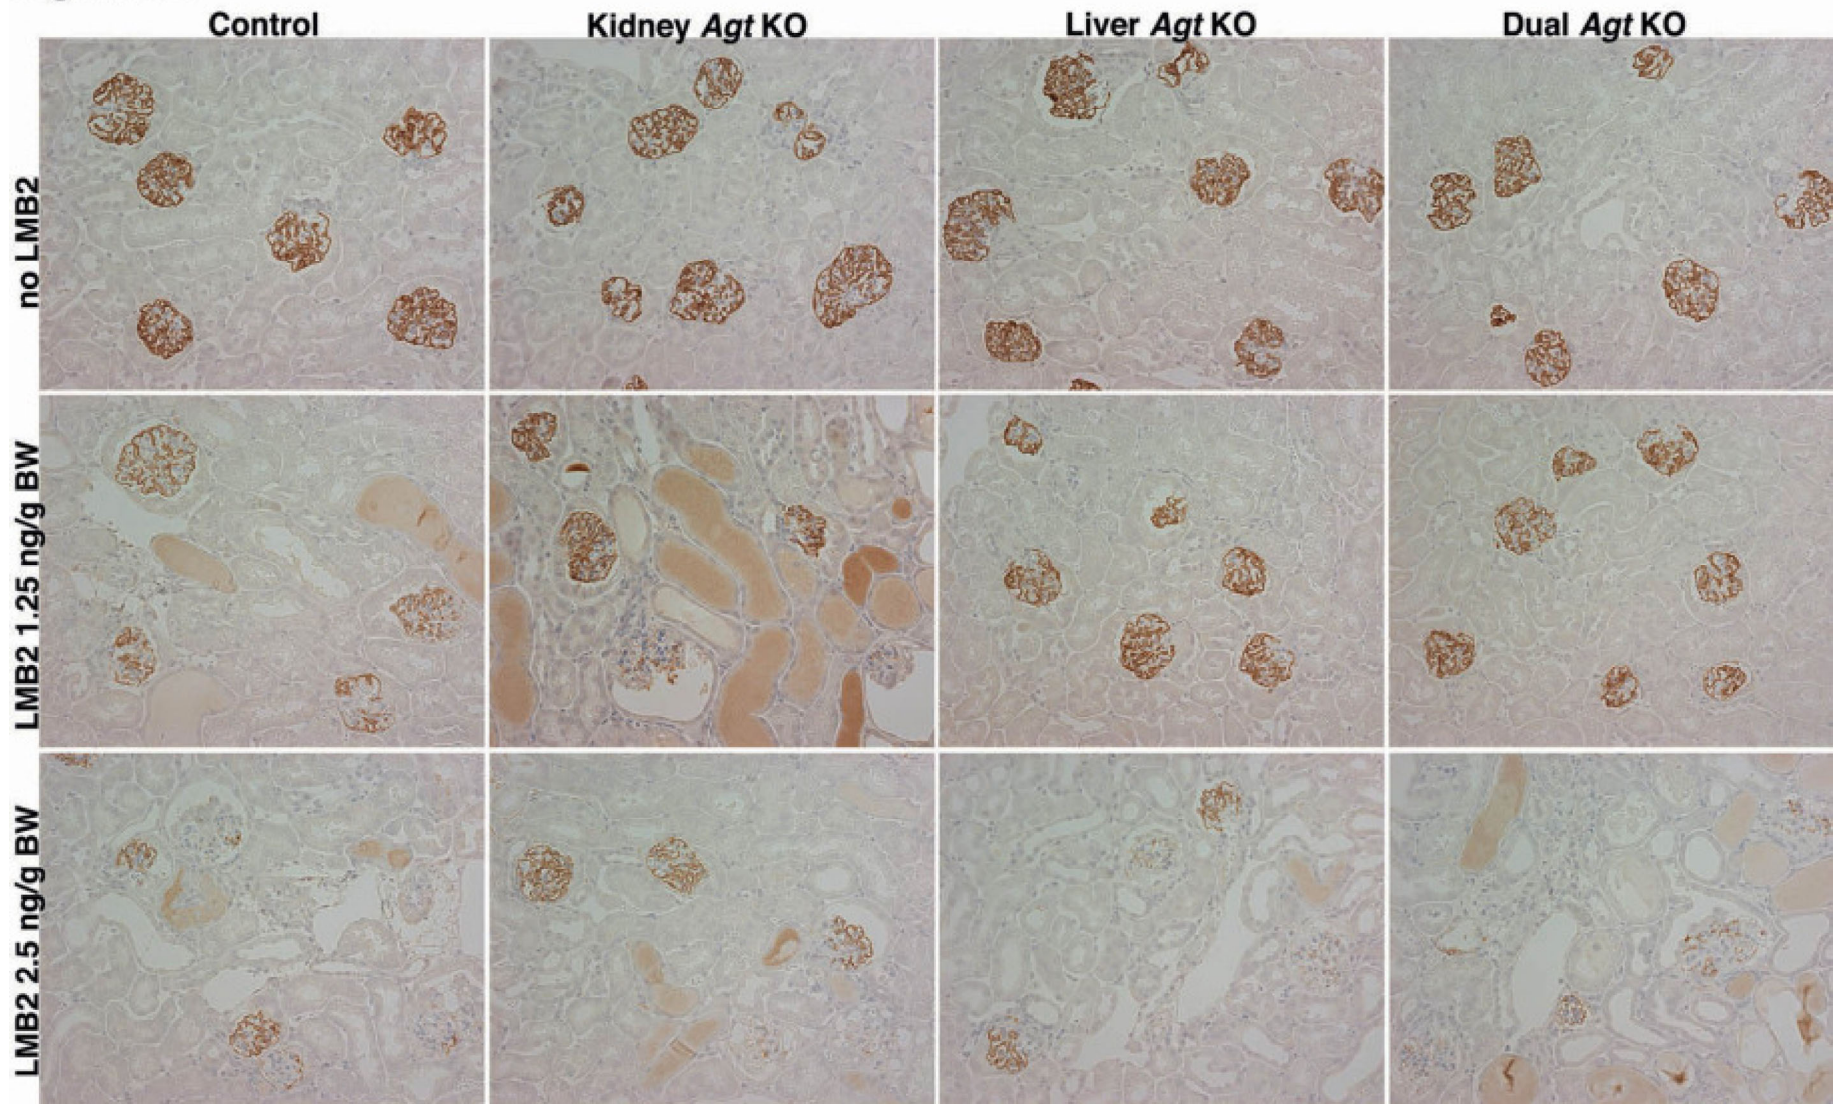

Supplement: NIHMS1643223-supplement-Supplemental_figure_S2.pdf [file NIHMS1643223-supplement-Supplemental_figure_S2.pdf]

Figure S3

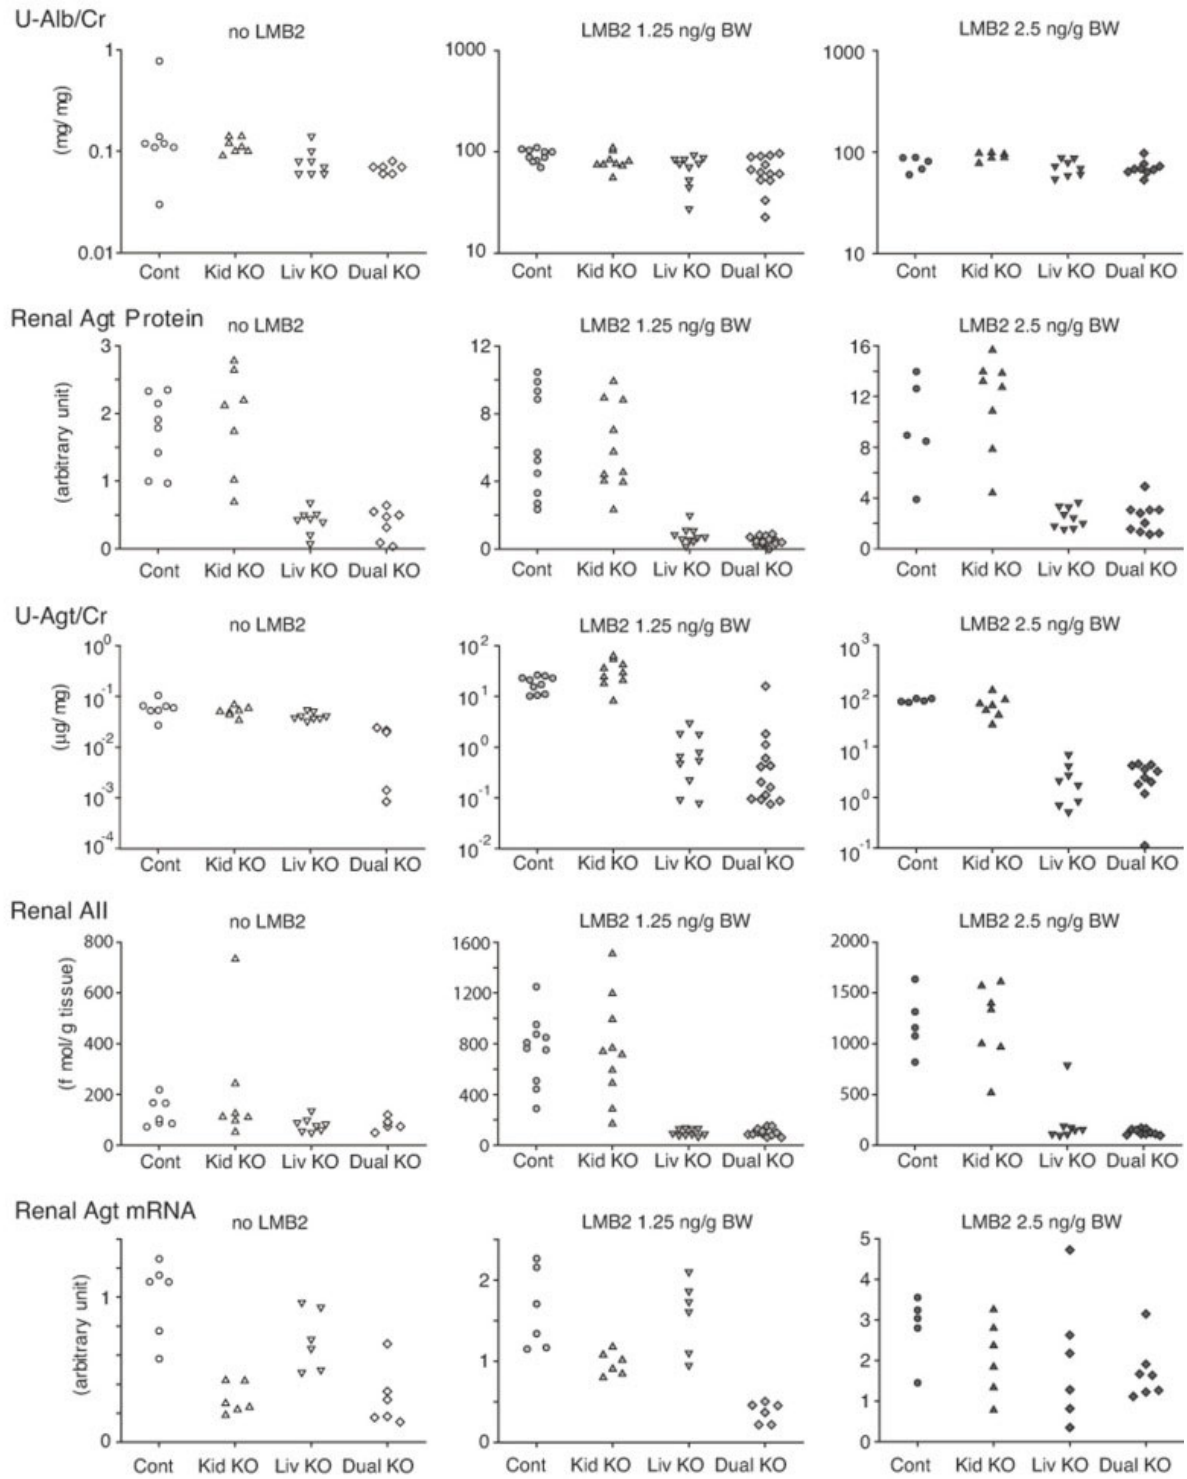

Supplement: NIHMS1643223-supplement-Supplemental_figure_S3.pdf [file NIHMS1643223-supplement-Supplemental_figure_S3.pdf]

**Figure S4**

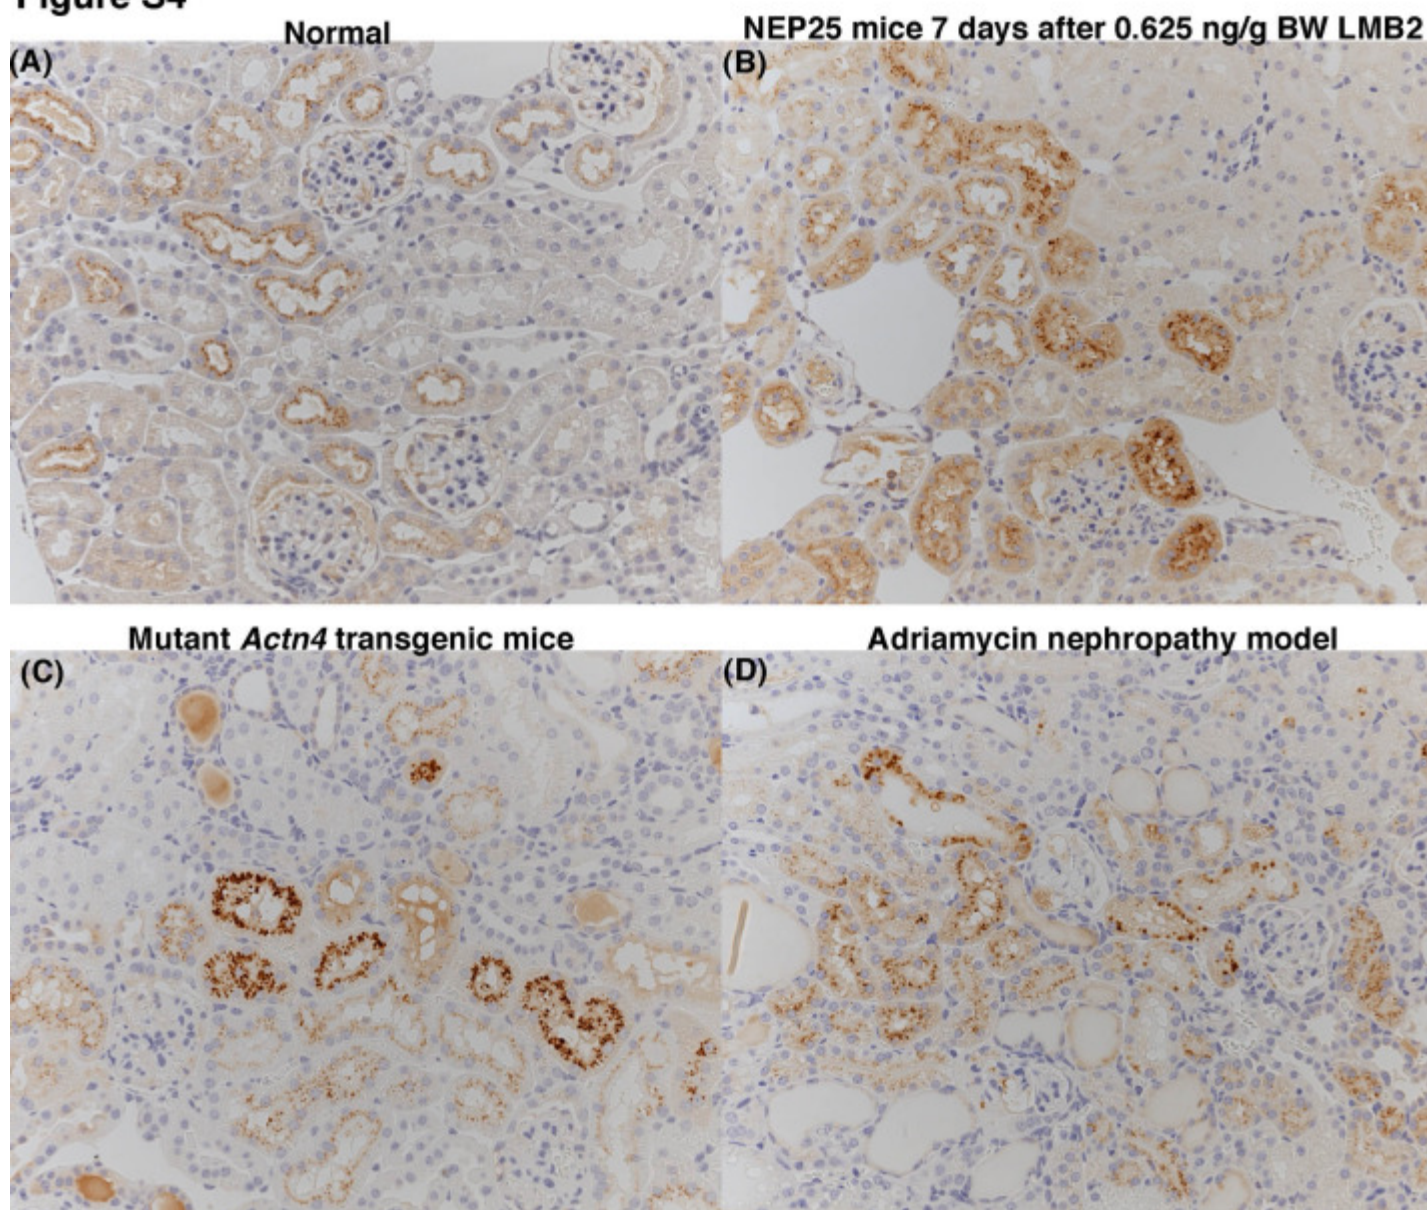

Supplement: NIHMS1643223-supplement-Supplemental_figure_S4.pdf [file NIHMS1643223-supplement-Supplemental_figure_S4.pdf]
